# Supplementary material for: Broad temperature range of cubic blue phase present in simple binary mixture systems containing rodlike Schiff base mesogens with tolane moiety
Source: Royal Society of Chemistry journal article supplement (doi:10.1039/c5sm02920a), 2016-01-01
Supplement: c5sm02920a1.pdf [file c5sm02920a1.pdf]

# Broad temperature range of cubic blue phase existed in simple binary mixture systems containing rodlike Schiff base mesogens with tolane moiety

Chiung-Cheng Huang<sup>\*a</sup>, Yu-Hao Chen<sup>a</sup>, Sheng-Yen Chen<sup>a</sup>, Yi-Zeng Sun<sup>a</sup>,  
Zong-Ye Wu<sup>a</sup>, Mei-Ching Yu<sup>a</sup>, Bo-Hao Chen<sup>b</sup>, I-Jui Hsu<sup>\*b</sup>, Lai-Chin  
Wu<sup>c</sup> and Jey-Jau Lee<sup>c</sup>

<sup>a</sup>Department of Chemical Engineering, Tatung University, Taipei 104, Taiwan E-mail: chchhuang@ttu.edu.tw

<sup>b</sup>Department of Molecular Science and Engineering, National Taipei University of Technology, Taipei 106, Taiwan

E-mail: ijuihsu@ntut.edu.tw

<sup>c</sup>National Synchrotron Radiation Research Center of Taiwan, Hsinchu 300, Taiwan

## Electronic supplementary information (ESI)

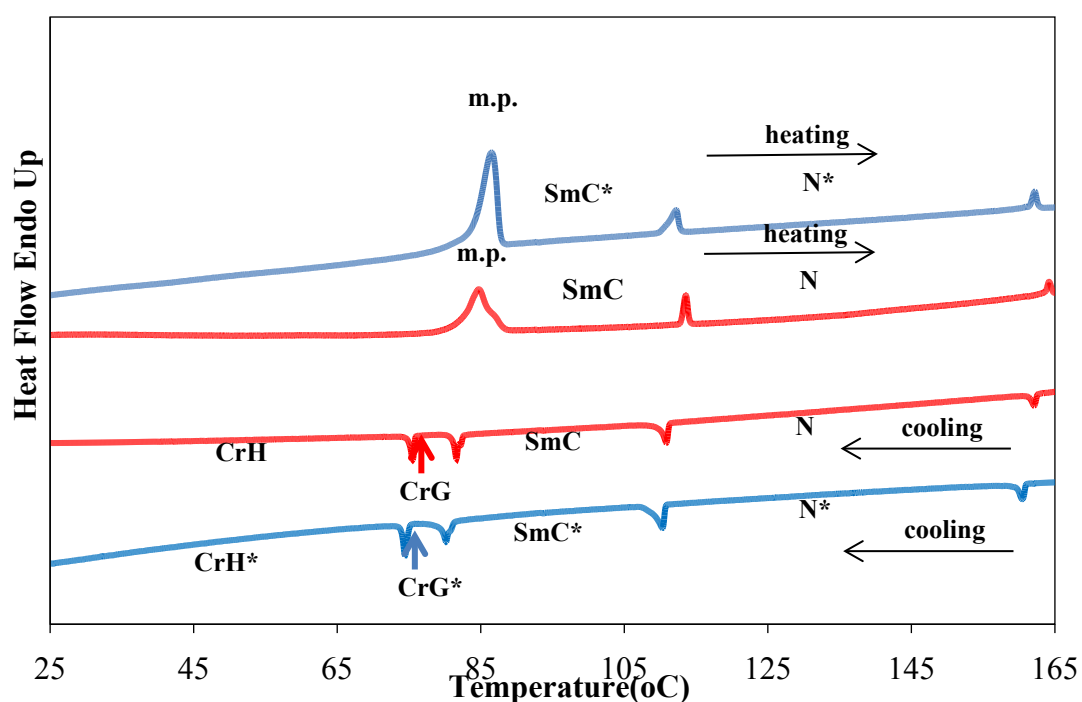

**Fig. S1** The DSC measurement of compounds (S)-OH-TI (blue line) and OH-TI (red line) on heating and cooling recycle.

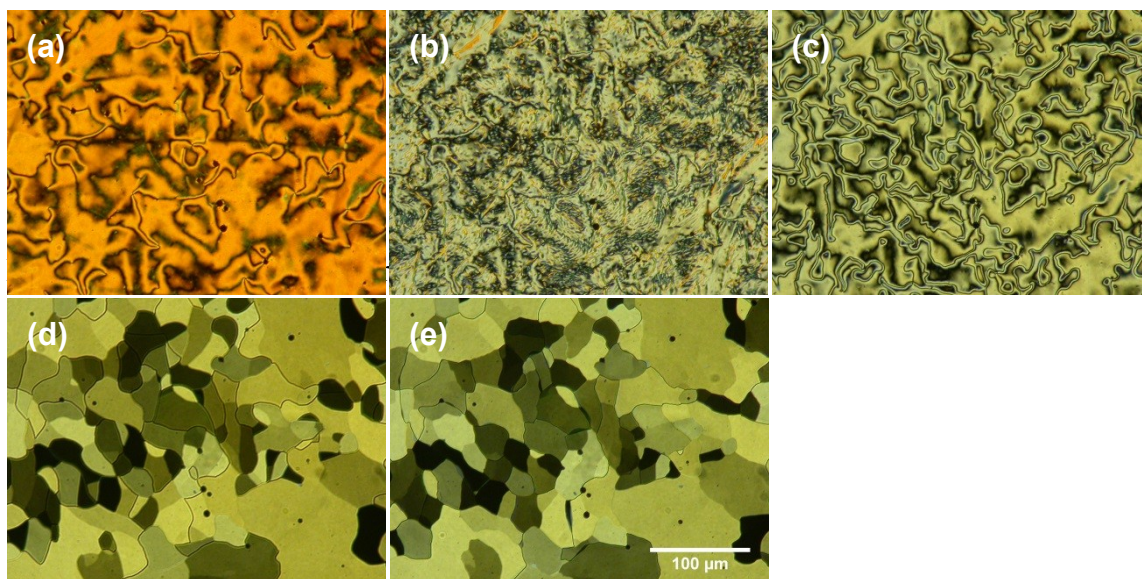

**Fig. S2** Microphotographs for compound **OH-TI**

(a) N texture at 149.3°C; (b) N - SmC texture at 110.4°C; (c) SmC texture at 100.0°C; (d) CrG texture at 79.8°C; (e) CrH texture at 68.0°C.

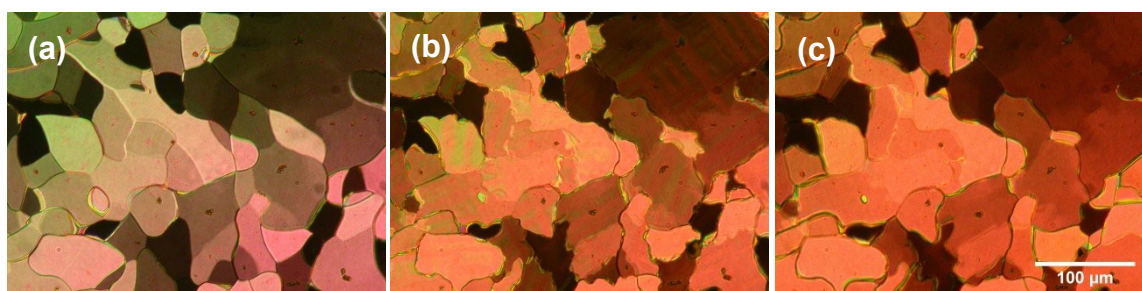

**Fig S3.** Transition from mosaic texture of the soft crystal G to the soft crystal H of compound **OH-TI<sub>7</sub>** observed in the other area. (a) CrG texture at 78.6°C; (b) CrG-CrH texture at 75.8°C; (c) CrH texture at 70.0°C.

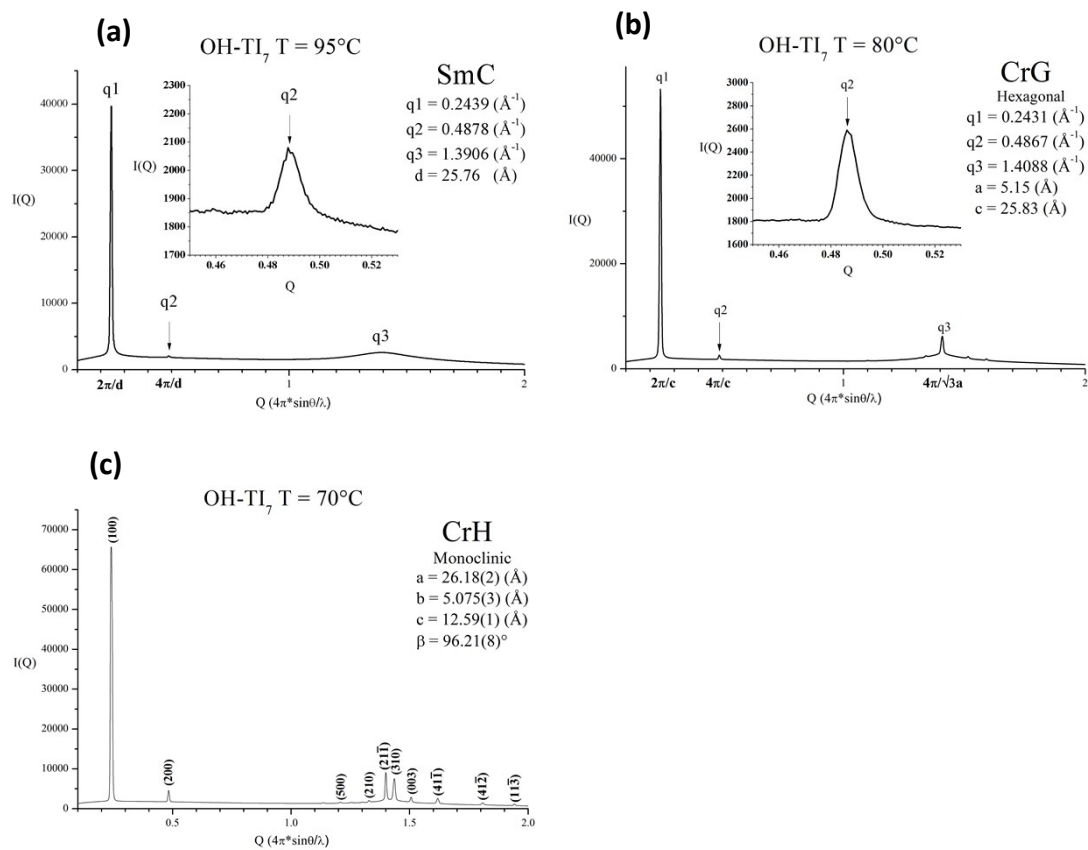

**Fig. S4** The variable-temperature XRD measurements of compound **OH-Tl<sub>7</sub>**.

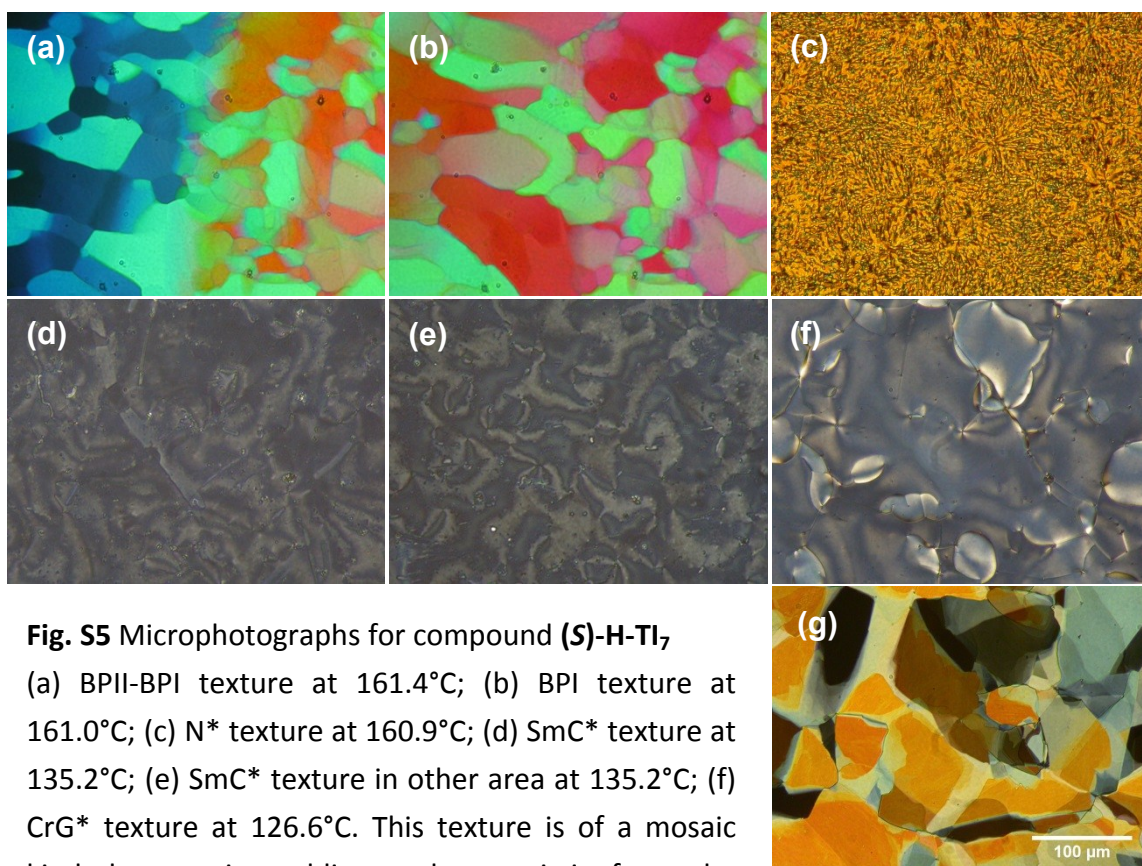

**Fig. S5** Microphotographs for compound **(S)-H-TI<sub>7</sub>**  
 (a) BPII-BPI texture at 161.4°C; (b) BPI texture at 161.0°C; (c) N\* texture at 160.9°C; (d) SmC\* texture at 135.2°C; (e) SmC\* texture in other area at 135.2°C; (f) CrG\* texture at 126.6°C. This texture is of a mosaic kind, but retains schlieren characteristic from the smectic C phase ; (g) CrH\* texture at 99.8°C.

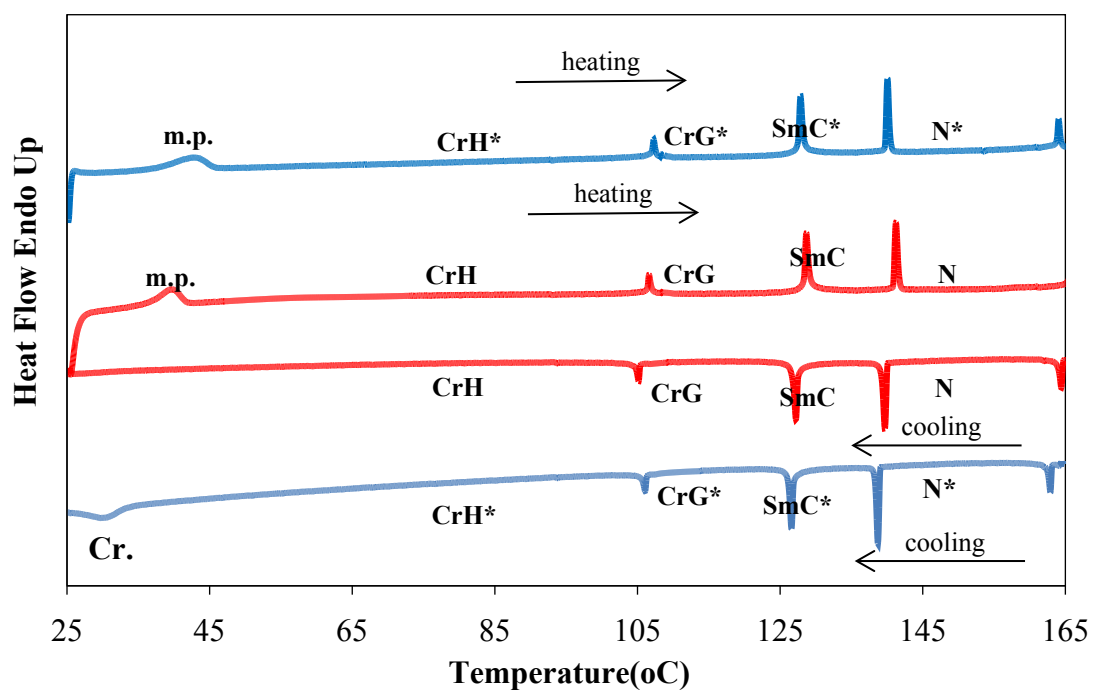

**Fig. S6** The DSC measurement of compounds **(S)-H-TI** (blue line) and **H-TI** (red line) on heating and cooling recycle.

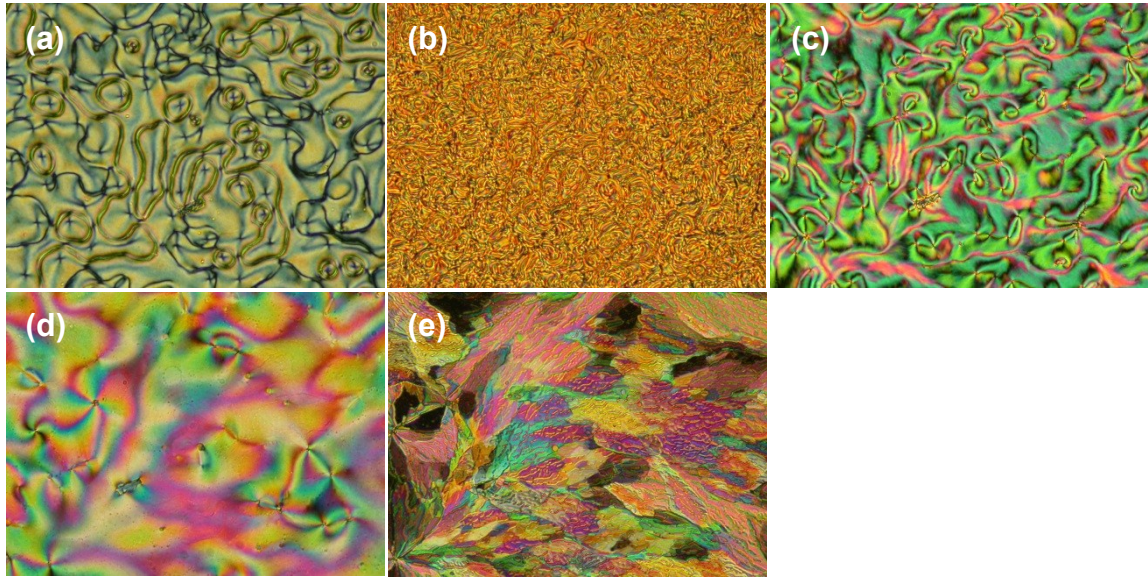

**Fig. S7** Microphotographs for compound **H-TI**

(a) N texture at 149.8°C; (b) N-SmC texture at 139.8°C; (c) SmC texture at 136.1°C;  
(d) CrG texture at 121.9°C; (e) CrH texture at 101.8°C.

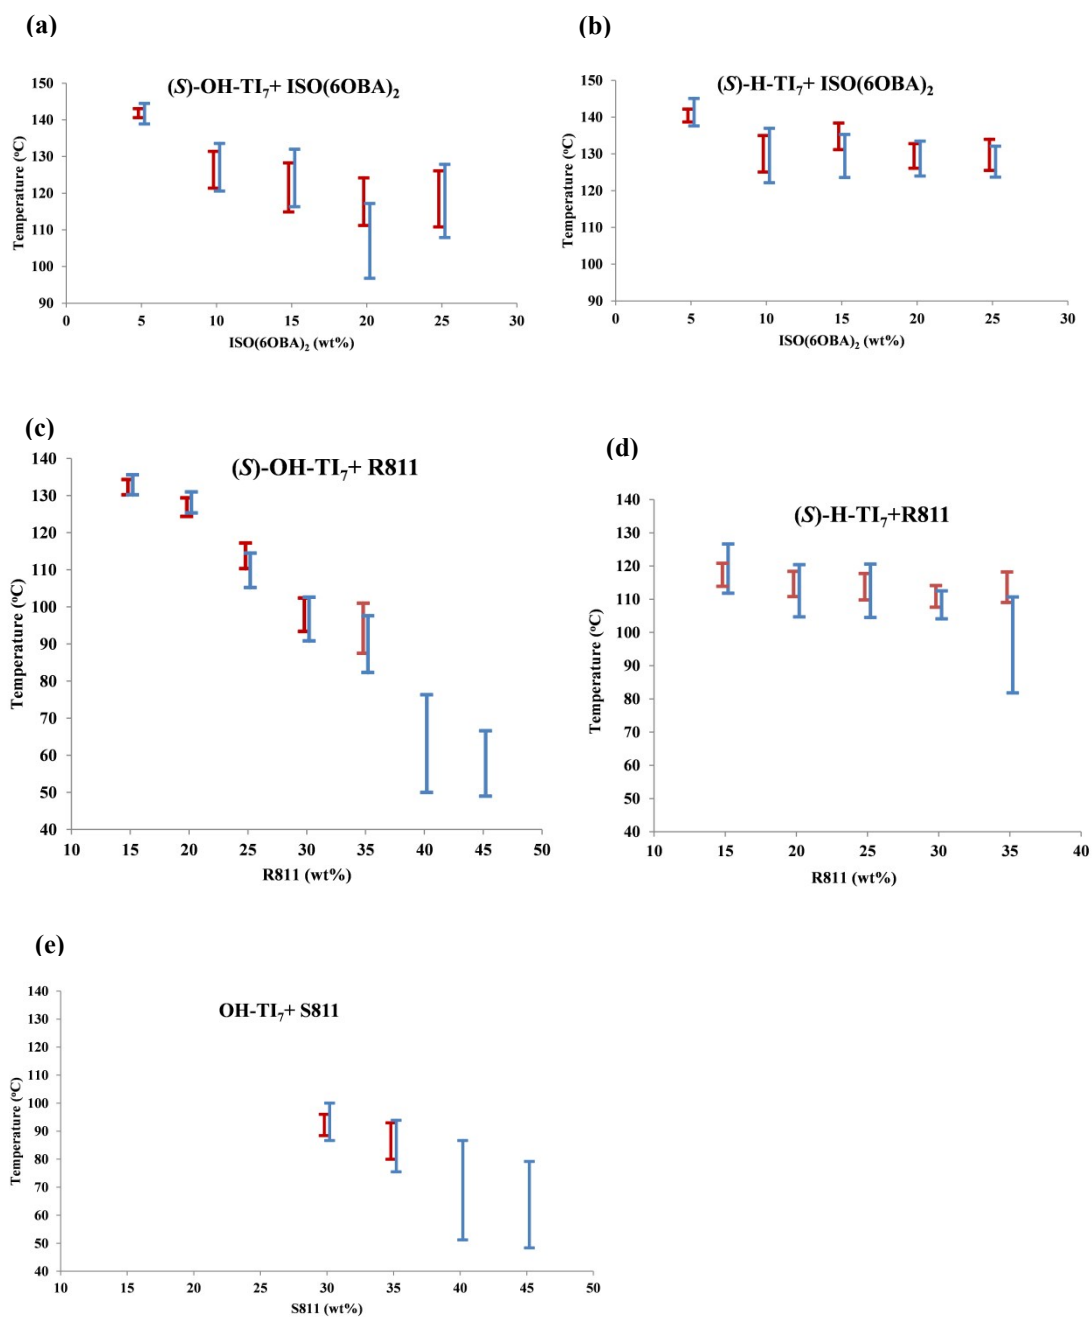

**Fig. S8** The comparison of BP temperature range for the different blending mixture systems in heating (red line) and cooling processes (blue line).

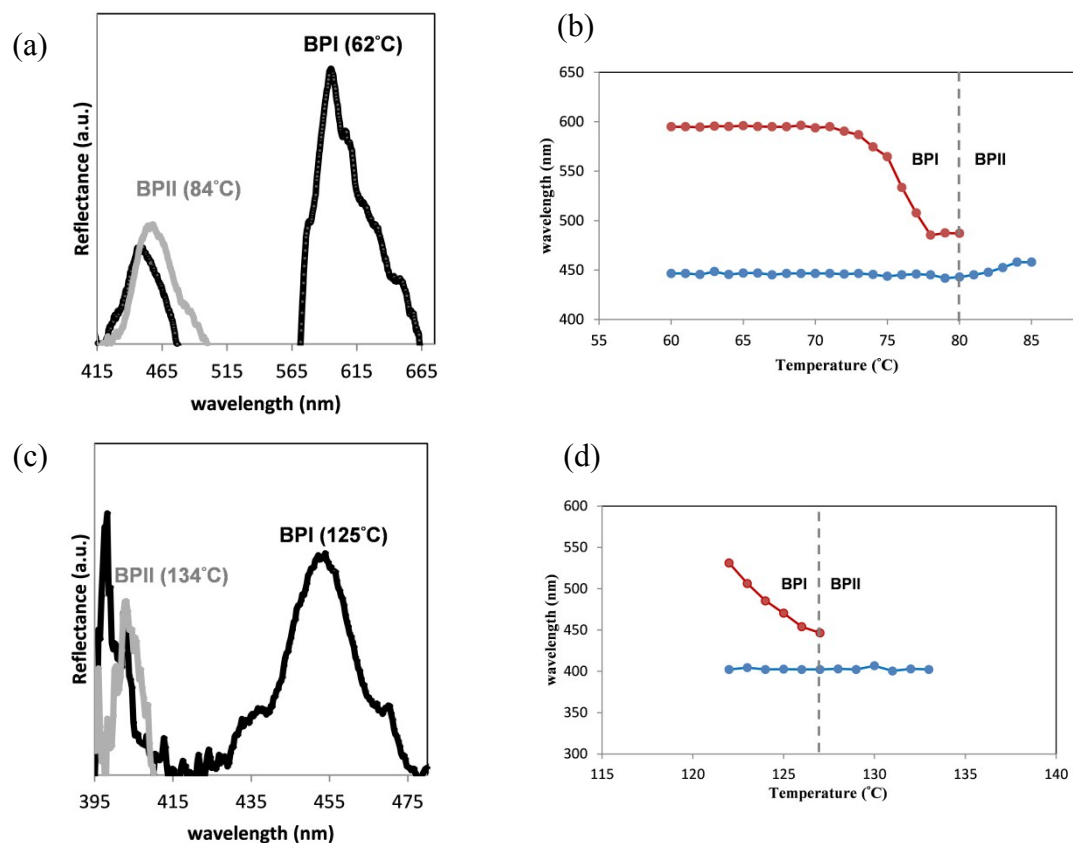

**Fig. S9** Typical reflectance profiles of the higher-temperature phase (gray line) and the lower-temperature phase (black line) for the blending system mixture (a) **OH-TI<sub>7</sub>** + 40% **S811** and (c) **(S)-OH-TI<sub>7</sub>** + 10% **IOS(6OBA)<sub>2</sub>**. Temperature dependence of the Bragg reflection wavelength for the blending mixture consisting of **OH-TI<sub>7</sub>** + 40% **S811** (b) and **(S)-OH-TI<sub>7</sub>** + 10% **IOS(6OBA)<sub>2</sub>** (d) during cooling process with a rate of 0.5 °C min<sup>-1</sup>.

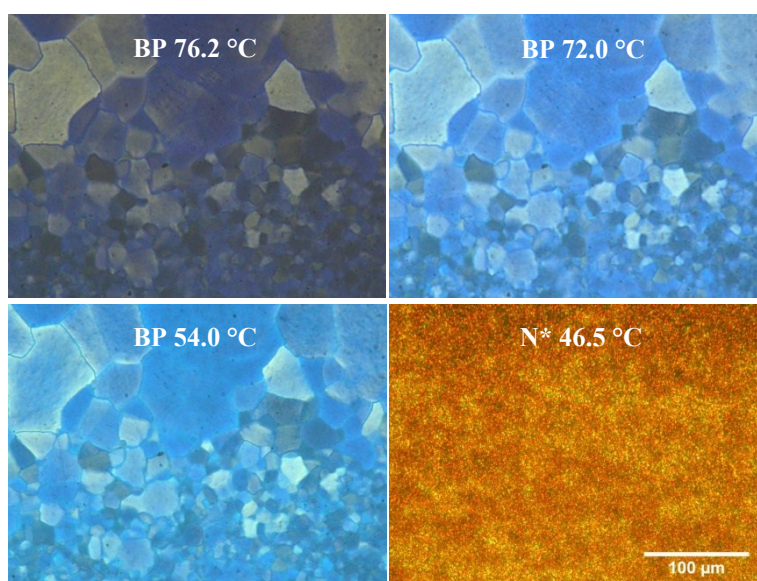

**Fig. S10** Microphotographs for compound **(S)-OH-TI** blended with 40.0 wt% **R811**.

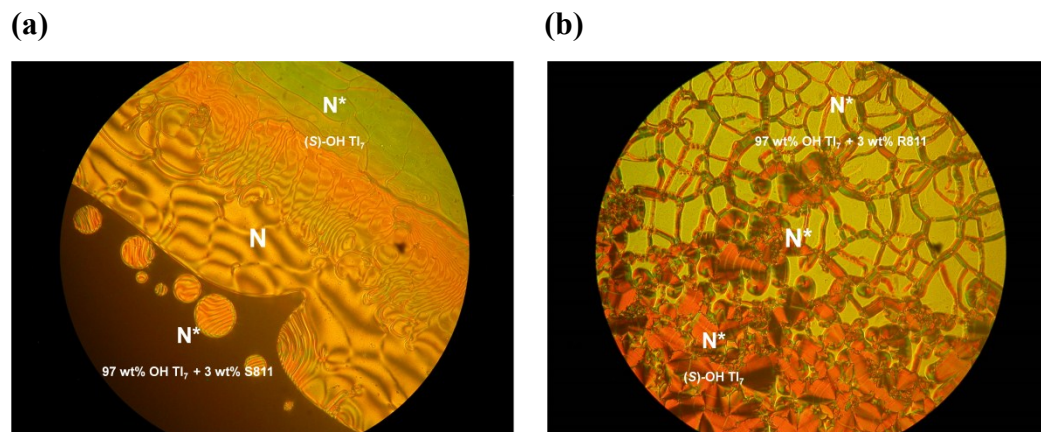

**Fig. S11** Contact test of Schiff base (S)-OH-TI<sub>7</sub> and the mixture of racemic Schiff base OH-TI<sub>7</sub> doped with 4 wt% S811 (a) and R811 (b).

**Measurements of helical pitch and helical twisting power of two chiral Schiff base mesogens and binary mixture system composed of 60 wt% racemic Schiff base and 40 wt% S811 by Cano's Wedge method.**

The helical pitch ( $p$ ) was evaluated by measuring the distance ( $a$ ) between Cano lines as follows:  $p = 2a \tan\theta$ , where  $\theta$  is the angle of the wedge of the cell.

In this experiment, the cell's  $\tan\theta$  is 0.0196, the concentration of the chiral dopant  $c$  is 4%.

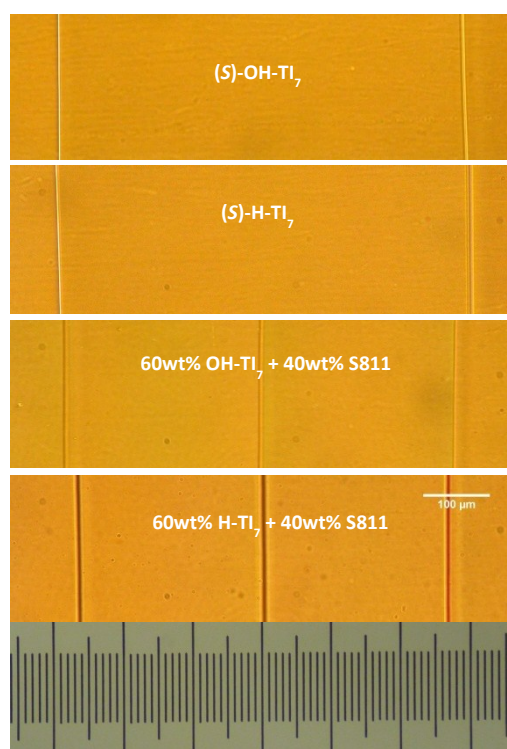

**Fig. S12** Cano's Wedge method to measure the helical pitch of two chiral Schiff base mesogens and binary mixture system composed of 60 wt% racemic Schiff base and 40 wt% S811.



**The DSC diagram, POM texture and XRD variable-temperature XRD of Schiff base mesogen OH-TI<sub>77</sub>.**

The DSC (Fig. S13) and POM pictures (Fig. S14) have indicated that Schiff base compound **OH-TI<sub>77</sub>**, on cooling from its isotropic phase, displayed nematic Schlieren texture (N phase, Fig. S14a), straited texture below N-SmC transition (Fig. S14b), Schlieren texture with narrow dark four brushes (SmC phase, Fig. S14c), Schlieren texture with broader dark four-brushes (SmF phase, Fig. S14d), mosaic terrace-like relief with larger domains (the soft crystal CrG phase, Fig. S14e), mosaic texture with small platelet area that are cross-hatched by grainings (the soft crystal CrH phase, Fig. S14f) and two crystal phase (Fig. S14g and Fig. S14h).

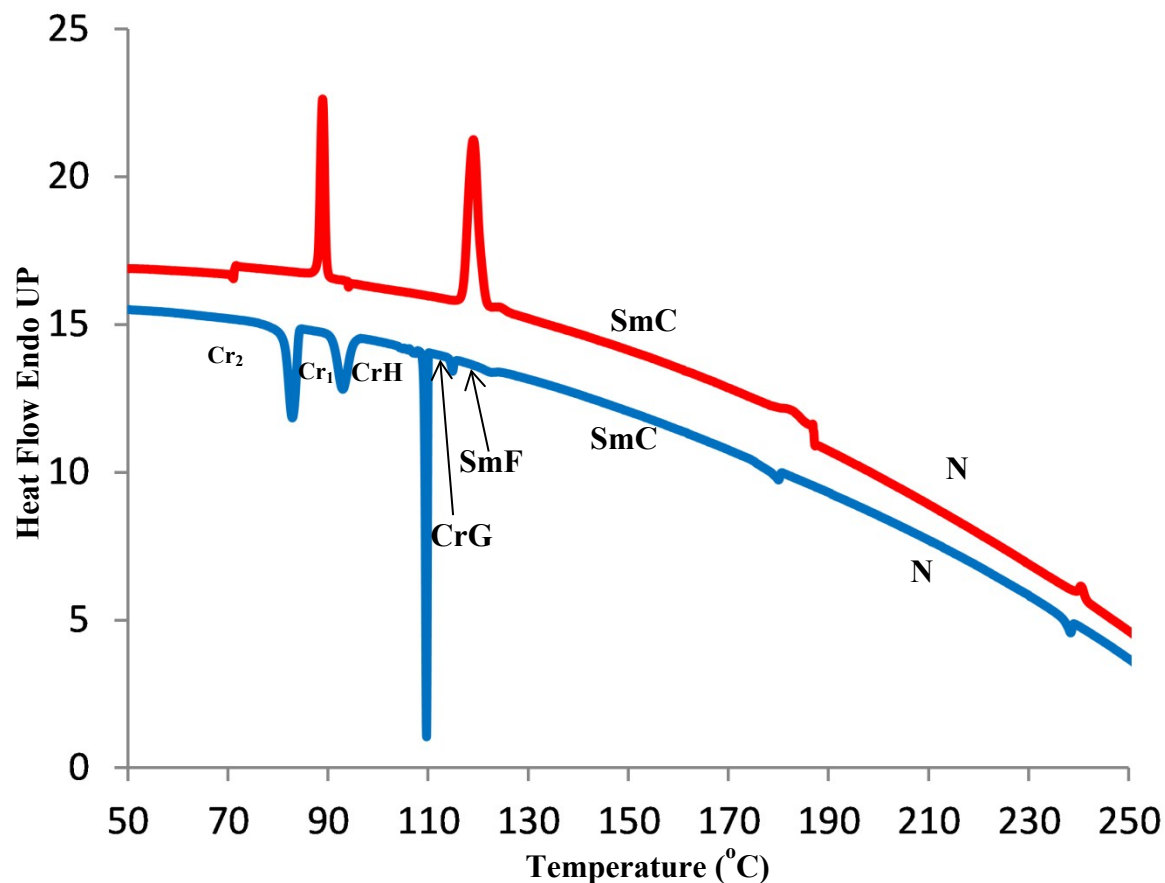

**Fig. S13** The DSC measurement of compounds **OH-TI<sub>77</sub>** on heating (red line) and cooling recycle (blue line).

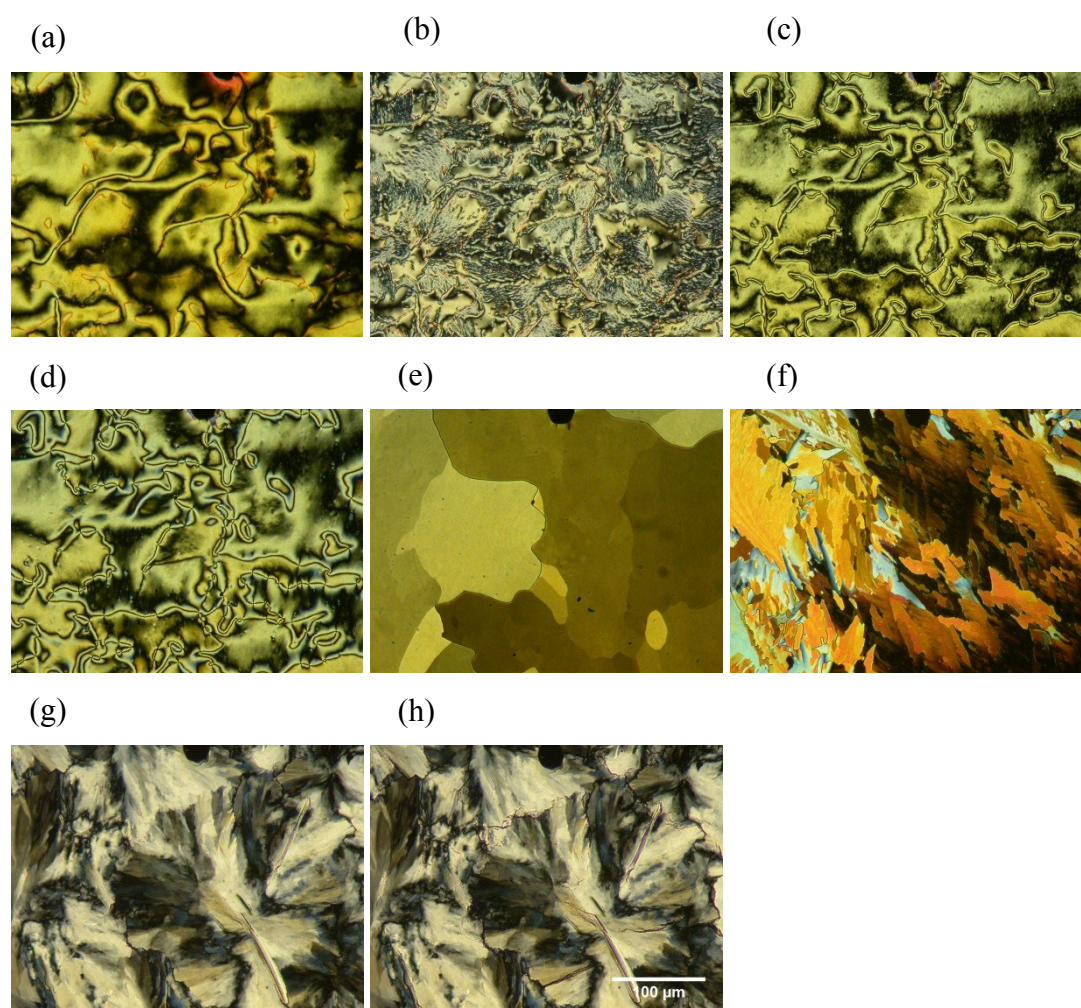

**Fig. S14** Microphotographs of compound **OH-TI<sub>77</sub>** observed under the POM: (a) N texture at 210.0°C; (b) N - SmC transition texture at 181.6°C; (c) SmC texture at 130.0°C; (d) SmF texture at 120.0°C; (e) CrG texture at 112.0°C; (f) CrH texture at 100.0°C; (g) Cr<sub>1</sub> texture at 87.8°C; (h) Cr<sub>2</sub> texture at 74.2°C.

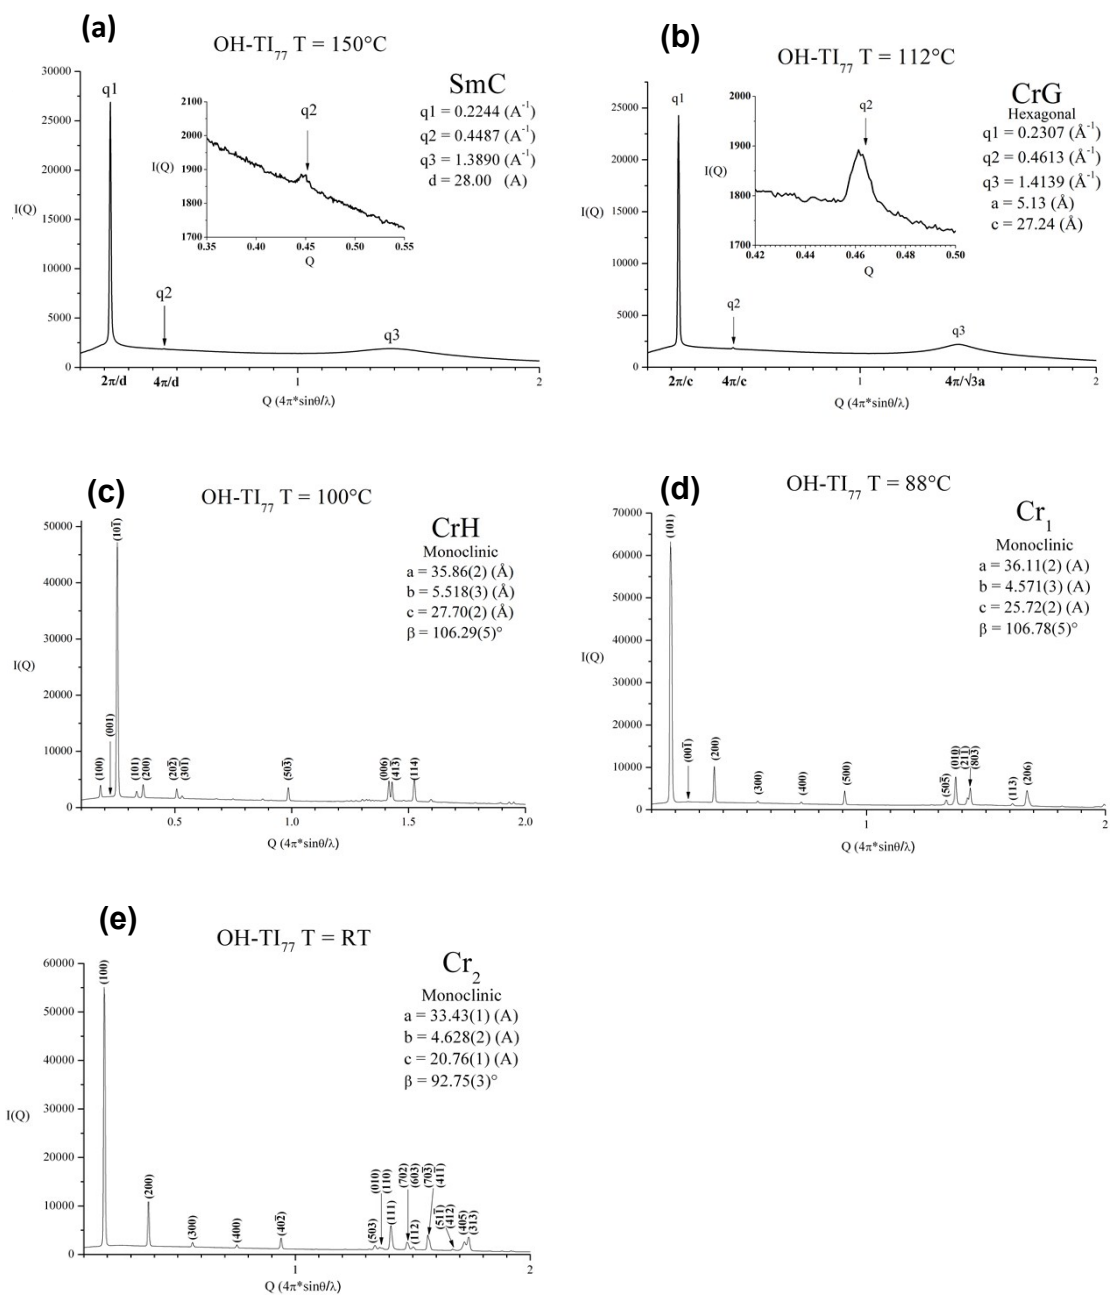

**Fig. S15** The variable-temperature XRD measurements of compound **OH-Tl<sub>77</sub>**.

Schiff base

HOMO

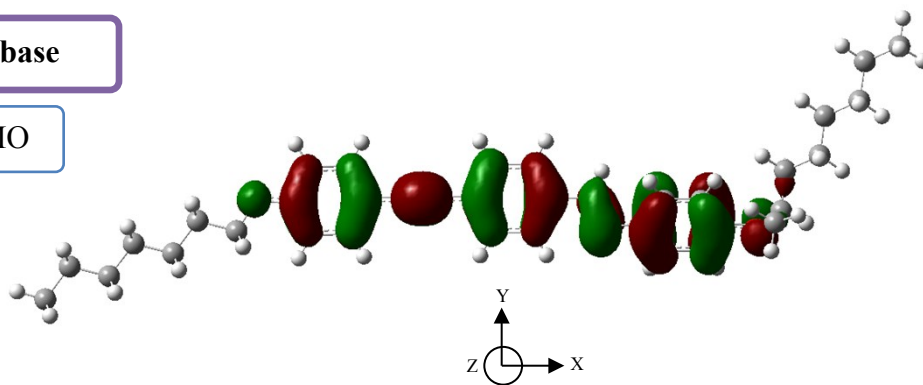

LUMO

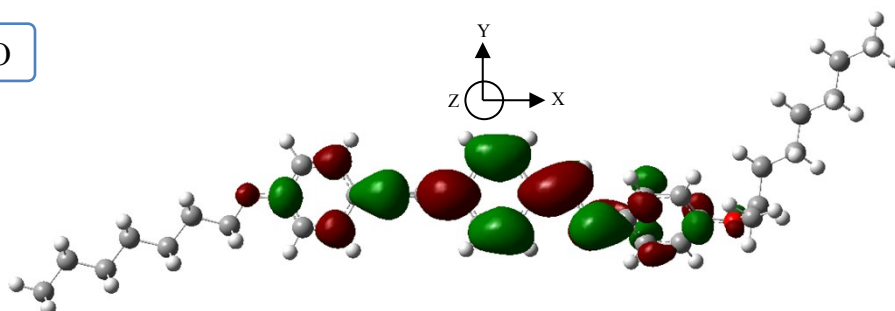

Salicylaldimine

HOMO

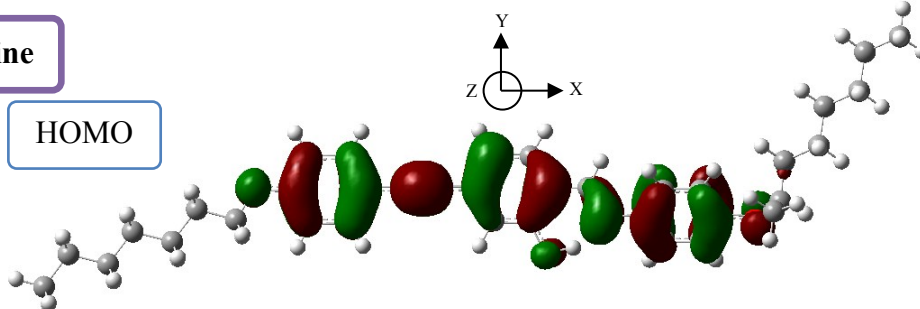

LUMO

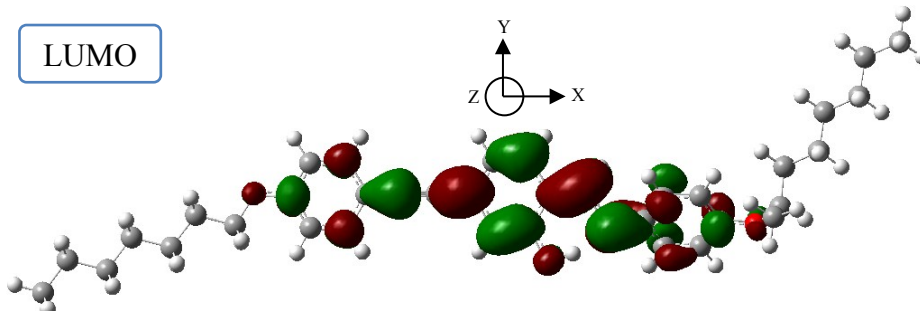

OH-TI<sub>77</sub>

HOMO

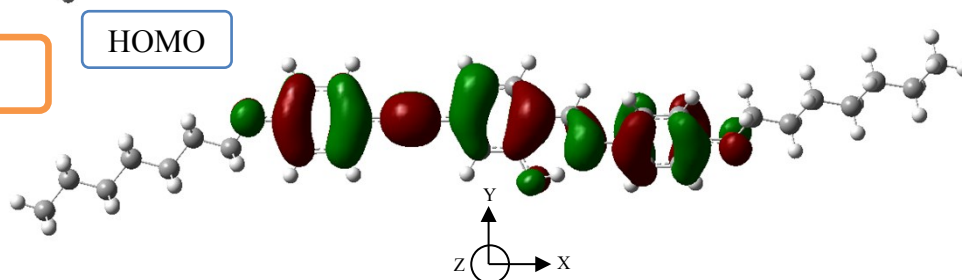

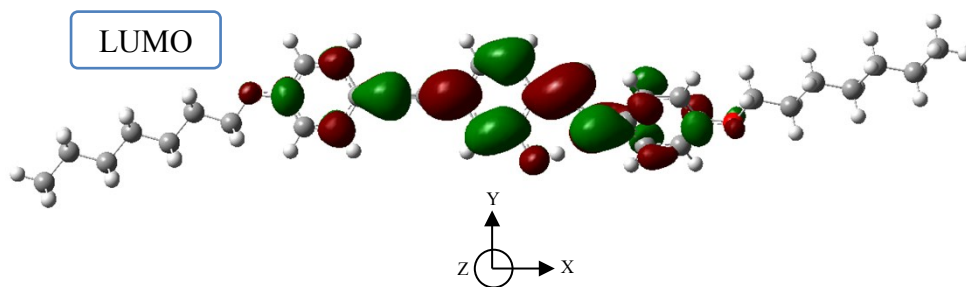

**Fig. S16.** HOMO and LUMO of **Schiff base** compound (a), **Salicylaldehyde** compound (b) and compound **OH-TI<sub>77</sub>** (c). The simulation exchange functional and basis set are CAM-B3LYP and 6-311G(d, p), respectively. The isosurface is drawn at value of 0.02.

**Table S1.** A comparison table with different basis sets and exchange functionals on the calculated dipole moment in **Schiff base** compound, **Salicylaldimine** compound and compound **OH-TI<sub>77</sub>**.

| Exchange functional | Basis set   | Dipole Moment (Debye) |                 |                     |
|---------------------|-------------|-----------------------|-----------------|---------------------|
|                     |             | Schiff base           | Salicylaldimine | OH-TI <sub>77</sub> |
| CAM-B3LYP           | 6-311G(d,p) | 1.8072                | 2.2053          | 1.9450              |
|                     | def2-tzvp   | 1.9057                | 2.1953          | 1.9520              |
|                     | 6-31G(d)    | 1.8032                | 2.1847          | 1.9789              |
|                     | 6-31+G(d)   | 1.9425                | 2.3394          | 2.1277              |
| $\omega$ B97X       | 6-311G(d,p) | 1.6789                | 2.3066          | 1.9574              |
|                     | 6-31G(d)    | 1.6739                | 2.0637          | 2.0152              |
|                     | 6-31+G(d)   | 2.1211                | 2.1983          | 2.0575              |

**Table S2.** DFT calculated HOMO, LUMO, energy gap, dipole moment components,  $\mu_x$ ,  $\mu_y$ ,  $\mu_z$  and modulus ( $\mu$ ) for **Schiff base** compound, **Salicylaldimine** compound and compound **OH-TI<sub>77</sub>**.

| Exchange functional and Basis set | Compound                  | Energy (eV) |        |                 | Dipole moment ( $\mu$ in Debye) |         |         |               |
|-----------------------------------|---------------------------|-------------|--------|-----------------|---------------------------------|---------|---------|---------------|
|                                   |                           | HOMO        | LUMO   | $\Delta E$ (eV) | $\mu_x$                         | $\mu_y$ | $\mu_z$ | $\mu_{total}$ |
| CAM-B3LYP<br>6-311G(d,p)          | <b>Schiff base</b>        | -6.697      | -0.764 | 5.933           | -1.058                          | -0.850  | 1.194   | 1.807         |
|                                   | <b>Salicylaldimine</b>    | -6.736      | -0.842 | 5.894           | 0.543                           | 1.772   | 1.195   | 2.205         |
|                                   | <b>OH-TI<sub>77</sub></b> | -6.766      | -0.860 | 5.906           | 0.296                           | 1.775   | 0.738   | 1.945         |
| $\omega$ B97X<br>6-311G(d,p)      | <b>Schiff base</b>        | -7.641      | 0.116  | 7.757           | -0.937                          | 1.391   | 0.084   | 1.679         |
|                                   | <b>Salicylaldimine</b>    | -7.689      | 0.034  | 7.723           | 0.478                           | 1.671   | 1.518   | 2.307         |
|                                   | <b>OH-TI<sub>77</sub></b> | -7.701      | 0.014  | 7.715           | 0.286                           | 1.817   | 0.669   | 1.957         |

**Table S3.** DFT calculated principal polarizability components ( $\alpha_{XX}$ ,  $\alpha_{YY}$ ,  $\alpha_{ZZ}$ ), isotropic component  $\alpha^{iso} = (\alpha_{XX} + \alpha_{YY} + \alpha_{ZZ})/3$ , polarizability anisotropy  $\Delta\alpha = [\alpha_{XX} - (\alpha_{YY} + \alpha_{ZZ})/2]$  and asymmetry parameter  $\eta_\alpha = [(\alpha_{YY} - \alpha_{ZZ})/(\alpha_{XX} - \alpha^{iso})]$ , relative to the molecular polarizability tensor  $\alpha$ .

| Exchange functional and Basis set | Compound                  | $\alpha_{XX}$ | $\alpha_{YY}$ | $\alpha_{ZZ}$ | $\alpha^{iso}$ | $\Delta\alpha$ | $\eta_\alpha$ |
|-----------------------------------|---------------------------|---------------|---------------|---------------|----------------|----------------|---------------|
| CAM-B3LYP<br>6-311G(d,p)          | <b>Schiff base</b>        | 874.25        | 374.57        | 256.32        | 501.71         | 558.81         | 0.31742       |
|                                   | <b>Salicylaldimine</b>    | 892.29        | 380.81        | 256.42        | 509.84         | 573.68         | 0.32525       |
|                                   | <b>OH-TI<sub>77</sub></b> | 897.57        | 353.14        | 246.43        | 499.05         | 597.79         | 0.26777       |
| $\omega$ B97X<br>6-311G(d,p)      | <b>Schiff base</b>        | 818.70        | 373.20        | 261.67        | 484.53         | 501.27         | 0.33375       |
|                                   | <b>Salicylaldimine</b>    | 837.45        | 376.35        | 264.11        | 492.64         | 517.22         | 0.32551       |
|                                   | <b>OH-TI<sub>77</sub></b> | 846.19        | 351.98        | 249.84        | 482.67         | 545.28         | 0.28098       |

References:

1. D. Demus, S. Diele, M. Klapperstück, V. Link a and H. Zschke, *Mol. Cryst. Liq. Cryst.*, 1971, **15**, 161-174.
2. G. W. Gray and J. W. Goodby, *Smectic Liquid Crystals: Texture and structure*, Leonard Hill, Philadelphia, 1984.
3. I. Dierking, *Textures of Liquid Crystals*, Wiley-VCH, Weinheim, 2003.
